# Supplementary material for: CVD graphene electrochemistry: the role of graphitic islands
Source: Royal Society of Chemistry journal article supplement (doi:10.1039/c1cp21978b), 2011-01-01
Supplement: c1cp21978b.pdf [file c1cp21978b.pdf]

## Electronic Supporting Information

### ESI Figure 1

Raman spectra of our commercially obtained CVD-graphene grown directly onto a Ni film on an oxidised silicon wafer, showing both graphene (**A**) and graphitic (**B**) regions. Images kindly provided by the manufacturer.<sup>1</sup>

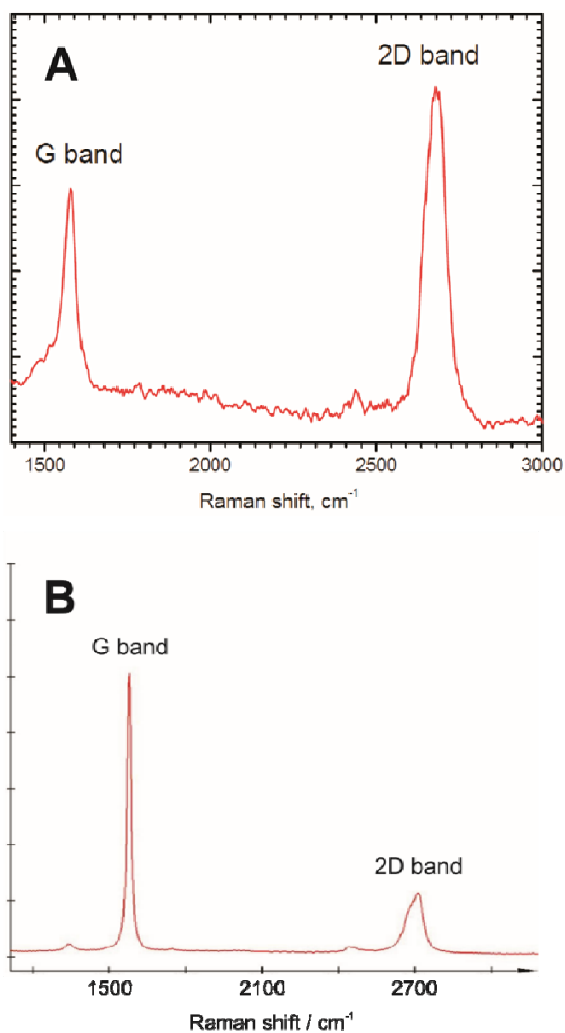

### ESI Figure 2

A cyclic voltammetric response recorded *via* repeat analysis as in Fig. 3A demonstrating the reproducibility of our observation. Note, an alteration in peak current is evident due to a change in the number of oxygenated species upon the working surface effectively altering the active surface area.

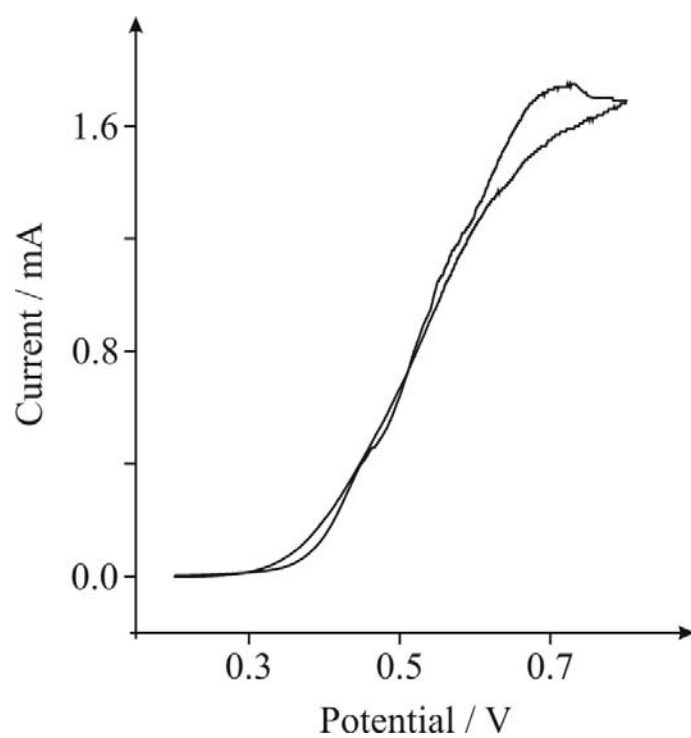

### ESI Figure 3

Enlarged reprint of Fig. 4, for the purpose of clarity.

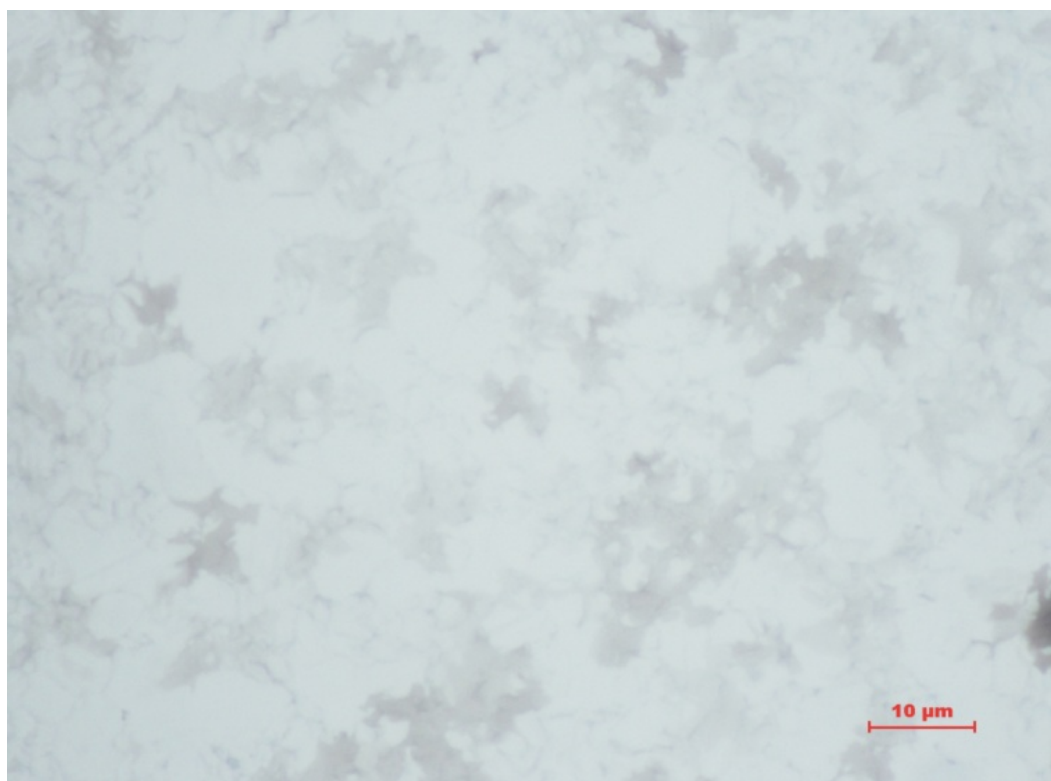

### References:

ESI1. [www.graphene-supermarket.com](http://www.graphene-supermarket.com); Raman is part of characterisation of a batch of chips.
